# Supplementary material for: Binary Silicone Elastomeric Systems with Stepwise Crosslinking as a Tool for Tuning Electromechanical Behavior
Source: MDPI journal article supplement (doi:10.3390/polym14010211), 2022-01-05
Supplement: s1 [file s1]

# Binary Silicone Elastomeric Systems with Stepwise Crosslinking as a Tool for Tuning Electromechanical Behavior

Adrian Bele <sup>1,\*</sup>, Liyun Yu <sup>2</sup>, Dascalu Mihaela <sup>1</sup>, Daniel Timpu <sup>1</sup>, Liviu Sacarescu <sup>1</sup>, Cristian-Dragos Varganici <sup>1</sup>, Daniela Ionita <sup>1</sup>, Dragos Isac <sup>1</sup> and Lavinia Matricala <sup>1</sup>

<sup>1</sup> “Petru Poni” Institute of Macromolecular Chemistry, Iasi, 700487, Romania; amihaela@icmpp.ro (D.M.); dtimpu@icmpp.ro (D.T.); livius@icmpp.ro (L.S.); varganici.cristian@icmpp.ro (C.-D.V.); dgheorghiu@icmpp.ro (D.I.); isac.dragos@icmpp.ro (D.I.); vasilu.lavinia@icmpp.ro (L.M.)

<sup>2</sup> Danish Polymer Centre, Department of Chemical and Biochemical Engineering, Technical University of Denmark, Kongens Lyngby, 2800, Denmark; lyyu@kt.dtu.dk

\* Correspondence: bele.adrian@icmpp.ro

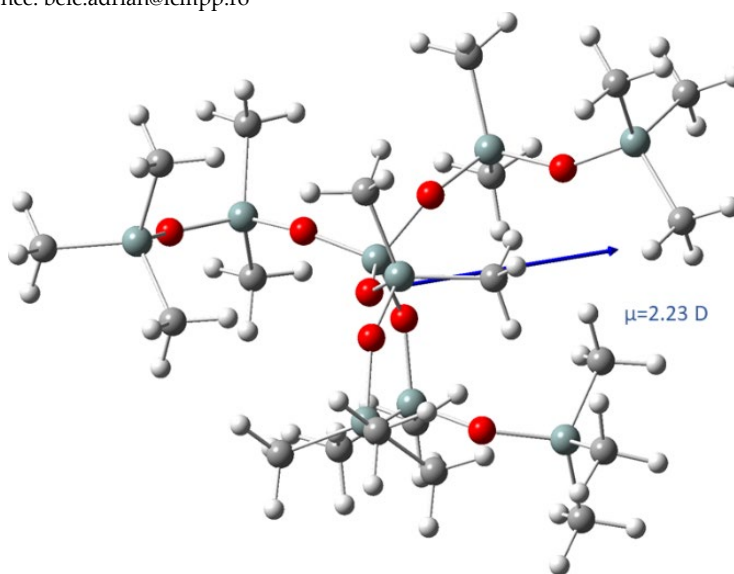

**Figure S1.** Representation of the equilibrium geometry and dipole moment orientation for structure A into the ground state. Theoretical calculations performed with the LC-wPBE/6-31G(d,p) method.

**Citation:** Bele, A.; Yu, L.; Mihaela, D.; Timpu, D.; Sacarescu, L.; Varganici, C.-D.; Ionita, D.; Isac, D.; Matricala, L. Binary Silicone Elastomeric Systems with Stepwise Crosslinking as a Tool for Tuning Electromechanical Behavior. *Polymers* **2022**, *14*, 200. <https://doi.org/10.3390/polym14010200>

Academic Editor: Marcin Masłowski

Received: 22 November 2021

Accepted: 29 December 2021

Published: 4 January 2022

**Publisher's Note:** MDPI stays neutral with regard to jurisdictional claims in published maps and institutional affiliations.

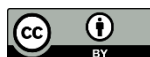

**Copyright:** © 2022 by the authors. Licensee MDPI, Basel, Switzerland. This article is an open access article distributed under the terms and conditions of the Creative Commons Attribution (CC BY) license (<http://creativecommons.org/licenses/by/4.0/>).

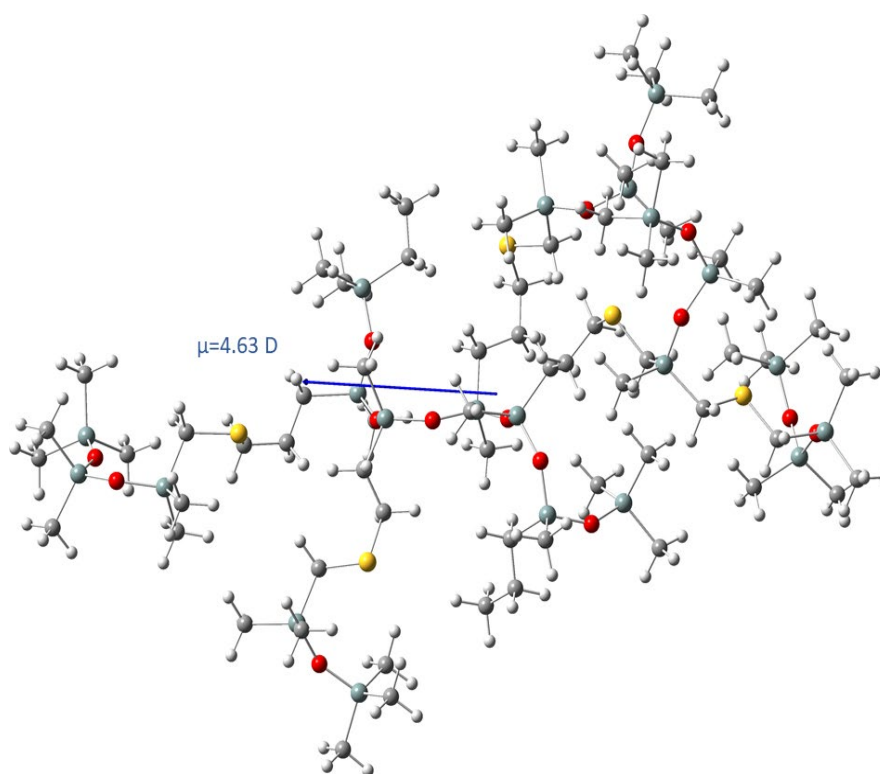

**Figure S2.** Representation of the equilibrium geometry and dipole moment orientation in the case of the structure B (or C) into the ground state. Theoretical calculations performed with the LC-WPBE/6-31G(d,p) method.

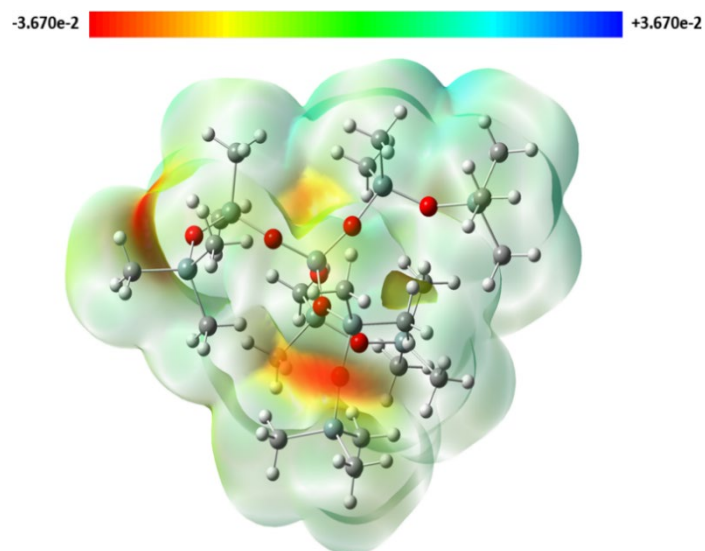

**Figure S3.** Electrostatic potential rendered as a mapped surface in the vicinity of molecule A (computation done at LC-WPBE/6-31G(d,p) level of theory).

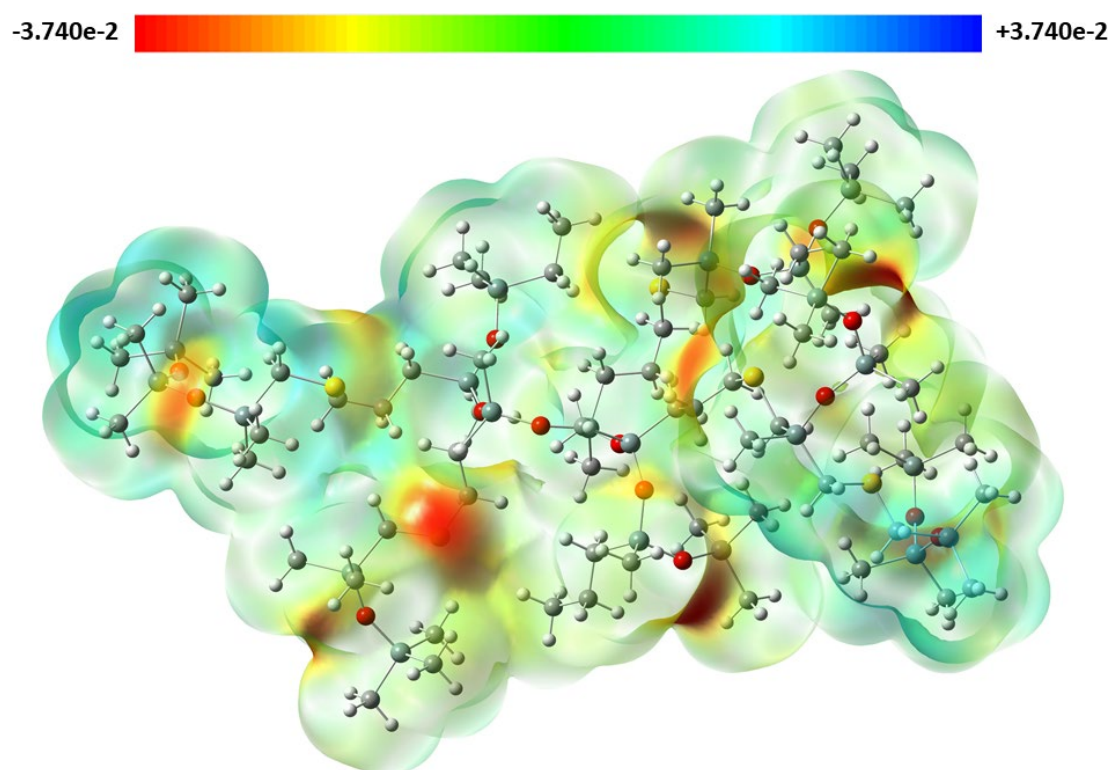

**Figure S4.** Electrostatic potential rendered as a mapped surface in the vicinity of molecule A (computation done at LC-wPBE/6-31G(d,p) level of theory).

| Table S1. The amounts used for obtaining the IPNs and the reference samples |      |       |       |       |       |       |       |       |       |       |       |       |       |       |       |       |       |       |
|-----------------------------------------------------------------------------|------|-------|-------|-------|-------|-------|-------|-------|-------|-------|-------|-------|-------|-------|-------|-------|-------|-------|
| Reagent/Sample                                                              | A    |       | B     |       | C     |       | A1B1  |       | A2B1  |       | A1B2  |       | A1C1  |       | A2C1  |       | A1C2  |       |
|                                                                             | g    | mmol  | g     | mmol  | g     | mmol  | g     | mmol  | g     | mmol  | g     | mmol  | g     | mmol  | g     | mmol  | g     | mmol  |
| FD 80                                                                       | 2    | 0.028 |       |       |       |       | 2     | 0.028 | 2     | 0.028 | 1     | 0.014 | 2     | 0.028 | 2     | 0.028 | 1     | 0.014 |
| DMSV31                                                                      |      |       | 2     | 0.071 |       |       | 2     | 0.071 | 1     | 0.014 | 2     | 0.071 |       |       |       |       |       |       |
| DMSV22                                                                      |      |       |       |       | 2     | 0.21  |       |       |       |       |       |       | 2     | 0.21  | 1     | 0.106 | 2     | 0.21  |
| TEOS                                                                        | 0.93 | 4.48  |       |       |       |       | 0.93  | 4.48  | 0.93  | 4.48  | 0.466 | 2.236 | 0.93  | 4.48  | 0.93  | 4.48  | 0.466 | 2.236 |
| DBTDL                                                                       | 0.01 | 0.016 |       |       |       |       | 0.01  | 0.016 | 0.01  | 0.016 | 0.005 | 0.008 | 0.01  | 0.016 | 0.01  | 0.016 | 0.005 | 0.008 |
| GP-367                                                                      |      |       | 0.176 | 0.048 | 0.258 | 0.071 | 0.176 | 0.048 | 0.088 | 0.024 | 0.176 | 0.048 | 0.258 | 0.071 | 0.129 | 0.035 | 0.258 | 0.071 |
| DMPA                                                                        |      |       | 0.108 | 0.42  | 0.113 | 0.44  | 0.108 | 0.42  | 0.054 | 0.21  | 0.108 | 0.42  | 0.113 | 0.44  | 0.056 | 0.218 | 0.113 | 0.44  |

Table S2. Thermal characteristics extracted from DSC data

| Sample | $T_{g1}$<br>(°C) | $T_{g2}$<br>(°C) | $T_{m1}$<br>(°C) | $\Delta H_{m1}$<br>(J/g) | $T_{m2}$<br>(°C) | $\Delta H_{m2}$<br>(J/g) | $T_{cr}$<br>(°C) | $\Delta H_{cr}$<br>(J/g) | $C_p$<br>(J/g °C) | $\chi_{PDMS/IPN}$<br>(%) |
|--------|------------------|------------------|------------------|--------------------------|------------------|--------------------------|------------------|--------------------------|-------------------|--------------------------|
| PDMS   | −122             | −120             | −42              | 23.46                    | −42              | 24.55                    | −68              | −24.34                   | 0.067             | 0.40                     |
| A      | −123             | −123             | −42              | 24.73                    | −42              | 24.67                    | −70              | −24.24                   | 0.074             | 0.40                     |
| B      | −119             | −119             | −45              | 21.52                    | −45              | 21.15                    | −81              | −22.27                   | 0.111             | 0.34                     |
| C      | −121             | −121             | −52              | 16.25                    | −52              | 16.81                    | −94              | −10.42                   | 0.115             | 0.27                     |
| A1B1   | −121             | −121             | −43              | 19.36                    | −42              | 20.34                    | −70              | −21.17                   | 0.151             | 0.33                     |
| A2B1   | −122             | −122             | −43              | 24.55                    | −42              | 26.86                    | −70              | −24.86                   | 0.108             | 0.40                     |
| A1B2   | −120             | −121             | −43              | 17.35                    | −43              | 17.98                    | −73              | −17.7                    | 0.079             | 0.29                     |
| A1C1   | −119             | −119             | −43              | 12.53                    | −43              | 12.55                    | −70              | −14.12                   | 0.083             | 0.20                     |
| A2C1   | −120             | −120             | −43              | 24.29                    | −43              | 24.9                     | −70              | −22.7                    | 0.086             | 0.40                     |
| A1C2   | −117             | −117             | −43              | 17.84                    | −43              | 17.78                    | −71              | −17.5                    | 0.096             | 0.29                     |

$T_{g1}$  – glass transition temperature corresponding to the first heating run;  $T_{g2}$  – glass transition temperature corresponding to the second heating run;  $T_{m1}$  – melting temperature corresponding to the first heating run;  $T_{m2}$  – melting temperature corresponding to the second heating run;  $\Delta H_{m1}$  – enthalpy of the melting profile corresponding to the first heating run;  $\Delta H_{m2}$  – enthalpy of the melting profile corresponding to the second heating run;  $T_{cc1}$  – cold crystallization temperature corresponding to the first heating run;  $T_{cc2}$  – cold crystallization temperature corresponding to the second heating run;  $\Delta H_{cc1}$  – enthalpy of the cold crystallization profile corresponding to the first heating run;  $\Delta H_{cc2}$  – enthalpy of the cold crystallization profile corresponding to the second heating run;  $\Delta H_{cr}$  – enthalpy of the crystallization profile;  $C_p$  – heat capacity;  $\chi_{PDMS/IPN}$  – degree of PDMS crystallinity in the networks.

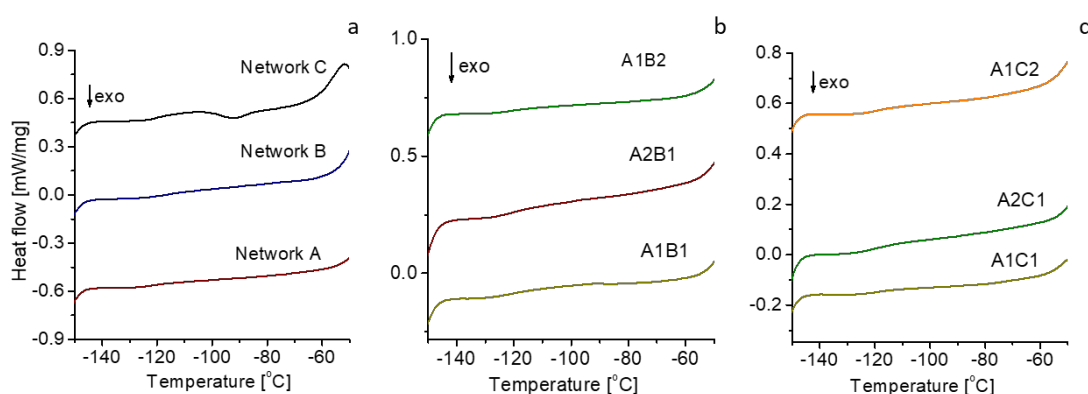

**Figure S5.** Inset of DSC data emphasizing the glass transition temperature.

**Table S3.** DMA data of reference sample A and AxCy series

| Sample | E' (Pa)               | T <sub>g</sub> |         | T <sub>m</sub> (°C) |
|--------|-----------------------|----------------|---------|---------------------|
|        |                       | tan δ          | T(°C)   |                     |
| A      | 2.94x10 <sup>8</sup>  | 0.101          | -118.08 | -36.13              |
| A2C1   | 5.75x10 <sup>8</sup>  | 0.112          | -112.9  | -35.5               |
| A1C1   | 1.44 x10 <sup>9</sup> | 0.105          | -115.1  | -36.2               |
| A1C2   | 2.06x10 <sup>9</sup>  | 0.085          | -113.93 | -38.4               |

**Table S4.** Mechanical and dielectric data of prepared samples in comparison with representative IPNs from literature.

| Sample                    | Sm (%) | Tnm (MPa) | Y (MPa) | ε'   | Ebd (V/μm) | UTT, (kJ/m <sup>3</sup> ) | ΔW/V (mJ/cm <sup>3</sup> ) |
|---------------------------|--------|-----------|---------|------|------------|---------------------------|----------------------------|
| A                         | 256    | 0.31      | 0.42    | 3.25 | 41         | 4.50                      | 8.23                       |
| B                         | 325    | 0.07      | 0.22    | 3.00 | 39         | 1.30                      | 7.79                       |
| C                         | 100    | 0.15      | 0.41    | 3.17 | 39         | 0.90                      | 6.54                       |
| A1B1                      | 267    | 0.70      | 1.27    | 4.08 | 40         | 11.00                     | 10.39                      |
| A2B1                      | 270    | 0.41      | 0.42    | 3.72 | 63         | 5.70                      | 9.48                       |
| A1B2                      | 247    | 0.81      | 0.61    | 3.71 | 25         | 11.20                     | 9.36                       |
| A1C1                      | 520    | 1.00      | 0.60    | 3.66 | 35         | 29.10                     | 9.80                       |
| A2C1                      | 720    | 1.50      | 1.00    | 3.86 | 47         | 63.00                     | 10.46                      |
| A1C2                      | 320    | 0.60      | 0.45    | 3.97 | 46         | 11.40                     | 10.30                      |
| Elastosil 3060            | 310    | 3.15      | 1.24    | 2.58 | 90         | 42.70                     | 6.67                       |
| ref 14 (sample 15wt%)     | 600    | 3.10      | —*      | —*   | 45         | —**                       | —*                         |
| ref 15 (sample IPN-P1)    | 484    | 0.30      | 0.27    | 2.92 | 60         | —**                       | 9.00                       |
| ref 15 (sample IPN-F2)    | 512    | 0.35      | 0.11    | 3.01 | 12         | —**                       | 1.90***                    |
| ref 15 (sample IPN-CN1)   | 486    | 0.27      | 0.03    | 3.62 | 15         | —**                       | 3.60***                    |
| ref 15 (sample IPN-F2)    | 692    | 0.32      | 0.13    | 2.93 | 29         | —**                       | 8.10                       |
| ref 16 (sample Si_A_IN10) | 560    | 3.30      | 0.26    | 3.30 | 55         | —**                       | 8.90                       |
| ref 16 (sample Si_B_IN10) | 670    | 2.70      | 0.22    | 3.80 | 53         | —**                       | 10.1                       |

Sm – Tensile strain (values given at break); Tnm – Tensile stress (values given at break); Y – Young's modulus (calculated at 5 % Sm); ε' – Dielectric permittivity (values given at 10<sup>3</sup> Hz); UTT – Ultimate tensile toughness; ΔW/V - Energy output at 25 V/μm; \* - values not available; \*\* - no values calculated due to the fact that raw mechanical data is needed in order to make calculations; \*\*\* - calculated at maximum Ebd provided by the authors.
